# Supplementary material
Source: Springer Nature journal article supplement (https://www.springermedizin.de/resource/supplementary/12955_2011_851_MOESM2_ESM.pdf/9561390)

# WOMAC function

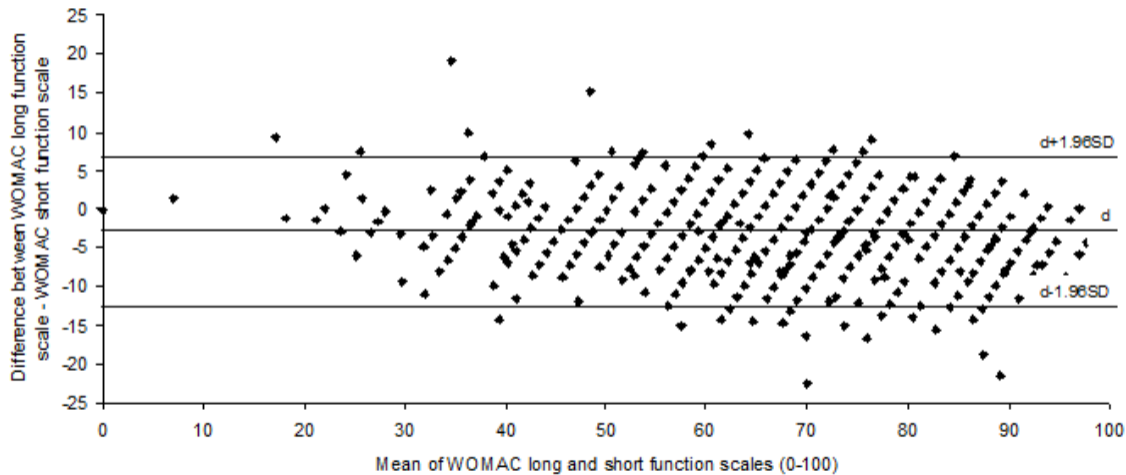

Supplement: MOESM2 [file 9561390]
